# Supplementary material for: Author Correction: Ancient genomes reveal social and genetic structure of Late Neolithic Switzerland
Source: PubMed Central journal article supplement (PMC7494889; doi:10.1038/s41467-020-18561-y), 2020-09-16
Supplement: 41467_2020_18561_MOESM1_ESM.pdf [file 41467_2020_18561_MOESM1_ESM.pdf]

## Table of Contents

|                                                                                                    |    |
|----------------------------------------------------------------------------------------------------|----|
| Supplementary Note 1: Archaeological information of the sites included in this study .....         | 2  |
| Supplementary Note 2: Radiocarbon dating of the newly sequenced individuals .....                  | 5  |
| Supplementary Note 3: Mitochondrial genome reconstruction.....                                     | 6  |
| Supplementary Note 4: Y-chromosomal haplogroup assignment .....                                    | 7  |
| Supplementary Note 5: ADMIXTURE Analysis.....                                                      | 10 |
| Supplementary Note 6: Sex-biased Admixture .....                                                   | 12 |
| Supplementary Note 7: Proportions of steppe ancestry on individual level .....                     | 13 |
| Supplementary Note 8: Estimated arrival time of the steppe component in the different regions .... | 15 |

## Supplementary Note 1: Archaeological information of the sites included in this study

### **Middle Neolithic**

#### **CH Niederried Ursisbalm 4458 – 4341 BCE (2sigma cal.)**

Tschumi 1920, Hug 1956, Schlaginhaufen 1924

The stone cist burial near Niederried was discovered and excavated in 1913. After rock blasting on a construction site, the graves were found below. The burial had an NW-SE orientation and was constructed with five tiles of chalk. The individual in the grave, an adult, was found in crouched position. Outside the stone cist, the bones of two subadults were found and probably from an earlier burial which was later removed from the cist. Four additional stone cist burials were destroyed by further blasts. Samples from two individuals were used for genetic analyses: A1 and A2 and showed sufficient DNA preservation. The two individuals, one female, and one male are unrelated. Radiocarbon dating hints to an age of 4458 – 4341 calBCE. Samples were provided by the Archaeological Service of the canton of Bern.

#### **F Lingolsheim 4786 – 2208 BC (2sigma cal.)**

Lichardus-Itten 1980

The burial ground of Lingolsheim was discovered in spring 1910 in a sandpit and comprises at least 20 graves. The individuals were found in stretched supine position in NW-SE orientation. From these individuals, one petrous bone from tomb 15 was used for genetic analysis. The male individual was dated to 4766-4601 calBCE.

Between 1923 and 1926 a second field session took place in a nearby second sandpit and 17 more graves were discovered. Four of these individuals were buried in crouched position in W-E orientation. Based on found potsherds the graves were assigned to the Rubané culture. From this group, the individual from tomb E was sampled for this study. The male individual dates to 2463-2208 calBCE contradicting the cultural assignment.

The 13 remaining burials were also found in stretched supine position and as the former ones from 1910 assigned to the Grossgartach culture. Petrous bones from the graves 18, 32 and 35 were used for DNA analysis. Only the individuals 18 and 35, a male and a female, contained enough DNA for downstream analysis. Only individual 35 could be dated to 4786-4618 calBCE. Samples were provided by the Museum of Archaeology in Strasbourg.

### **Late Neolithic**

#### **CH Oberbipp 3350-2650 BCE (2sigma cal.)**

Ramstein et al. 2014, Siebke et al. 2018, Siebke et al. 2019, Steuri et al. 2019

The Dolmen burial from Oberbipp was excavated in 2012. The site is situated on the Swiss Plateau and on the southern slope of the Jura mountains. The construction of the dolmen consists of large glacial erratics in the form of blocks and slabs. More than 2000 fragmented and commingled skeletal elements were retrieved at the excavation and a minimal number of 42 individuals as determined from femora including males and females of all age classes. An extended supine position could be reconstructed for the buried individuals in the grave chamber. In total 22 petrous bones from different individuals and 46 teeth could be sampled for aDNA analyses and radiocarbon dating. Samples were provided by the Archaeological Service of the canton of Bern.

#### **CH MuttENZ 3010 – 2706 BC (2sigma cal.)**

MuttENZ, and Hagmann D, editors. 2009; Siebke et al. 2019

The multiple burial of Muttenz was discovered in 1946. Details about the finding situation and the excavation are unknown. It contained at least 11 individuals of which five petrous bones from different individuals could be sampled for aDNA and radiocarbon dating. Samples were provided by the Archaeological Service of the canton of Basel Landschaft.

**CH Aesch 3094 – 2500 BC (2sigma cal.)**

Löhlein 2011; Stöckli 1995, Schegler 2016, Bay 1936

The dolmen burial of Aesch was excavated in 1907 and 1909. The megalithic burial consisted of one rectangular grave chamber 4m long and 3m wide with a flagged floor. Skeletal remains of 33 adult individuals and 14 children were recovered. 25 of the skeletons comprised petrous bones, which were used for DNA analysis and radiocarbon dating. Samples were provided by the Archaeological Service of the canton of Basel Landschaft.

**Final Neolithic/ Early Bronze Age**

**CH Spreitenbach 2900 – 2031 BC (2sigma cal.)**

Doppler 2012, Bleuer et al. 1999

In 1997 the multiple burial of Spreitenbach, Canton Aargau in Switzerland was discovered and excavated. The former wooden construction contained five males, four females, two subadults and a newborn in crouched position. The burials are radiocarbon dated to approximately 2500 BCE. All 12 individuals (pars petrosae) could be sampled for additional aDNA analyses. Samples were provided by the Archaeological Service of the canton of Argau.

**CH Bad Zurzach 2206 – 1946 BC (2sigma cal.)**

Bleuer et al. 2012, Doswald et al. 1989

The double burial of Bad Zurzach was excavated in 1984. The grave-pit is in N-S orientation without further stone or wooden construction and contained two adult individuals in contracted position. A contemporaneous burial of the two male individuals is assumed. For both a mature age of death is estimated. The burial was assigned to the Early Bronze Age and both individuals were sampled for aDNA analyses. Samples were provided by the Archaeological Service of the canton of Argau.

**CH Rapperswil 2695 – 2481 BC (2sigma cal.)**

Grüniger und Kaufmann 1982

During construction works in 1980, a stone cist burial near Rapperswil was discovered. Within the W-E oriented cist, the skeletal remains of an approximately 35-year-old female buried in extended supine position were found. In the abdominal region, bones of an eight lunar months old and probably unborn foetus were found. From both individuals, mother and child DNA could be retrieved. Samples were provided by the Archaeological Service of the canton of St. Gallen.

**CH Wartau 3036 BC – 2 AD (2sigma cal.)**

Stehrenberger 2016, Stehrenberger 2019

The human remains are located in a natural cave. In the 1970s and 1980s, several inspections by the archaeological service of the Canton St. Gallen took place. The cave was accessible to the public at all times and in the 1970s some human remains were recovered illegally and were transferred to the archaeological service in 2001. Radiocarbon dates of bone fragments date to the Middle, Late, and Final Neolithic period as well as to the Iron Age/Roman time. Eleven petrous bones were assed for DNA analyses. Samples were provided by the Archaeological Service of the canton of St. Gallen.

### **D Singen 2199 - 431 BC (2sigma cal.)**

Stockhammer et al. 2015, Oelze et al. 2011, Krause 1988

The Early Bronze Age cemetery of Singen (Hohentwiel) was excavated in the 1950s and is one of the largest and most important cemeteries of this period in Southern Germany. In close vicinity, Final Neolithic and later Bronze to Late Iron Age burials were excavated – providing an outstanding continuity of burials at the site. The Early Bronze Age necropolis of Singen is of particular interest, as it was used to define the eponymous “Singen Group” of the Early Bronze Age in Southwestern Germany characterized by the strict positioning of the deceased, stone constructions and particular burial goods. In total, 96 graves were excavated, and it was assumed that they can be related to one kin group. Human remains of approximately 30 individuals were recovered and 15 petrous bones selected for aDNA extraction. Radiocarbon dates of these individuals’ range between 2199 - 431 BC. Samples were provided by the Archaeological Office of the District of Constance.

### **D Anselfingen 2456-2203 BC (2sigma cal.)**

Merkl 2016

The site of Anselfingen “Breite”, Germany was first discovered in 2008 and excavated during several excavation sessions in the years from 2009 till 2017. Multiple Corded Ware and Bell Beaker associated graves could be recovered. Available for DNA analysis was the petrous bone of an adult individual from a double burial associated with the Bell Beaker phenomenon which was excavated in 2010. This individual was buried in N-S orientation and in crouched position and buried with the remains of a small child. Samples were provided by the Archaeological Office of the District of Constance.

### **CH Auvernier 2866-2601 BC (2sigma cal.)**

Schwegler 2016

The dolmen of Auvernier was discovered in 1876 near the lake Neuchâtel. The complex consisted of 12 vertical stone slabs and two horizontal ceiling tiles. In the burial chamber inhumations of 15 to 20 individuals could be found. Marks on the stone slabs indicate the reuse from an older Neolithic construction which was possibly used around 3000 BCE. The rebuilt dolmen is dated at 2800 BCE at the earliest and was used until the Bronze Age. The only DNA could be retrieved from one individual that dates to 2866-2601 calBCE. Samples were provided by the Archaeological Service of the canton of Bern.

### **CH Burgäschisee 2862-2581 BC (2sigma cal.)**

Ulrich-Bochsler 2012; Schlaginhaufen 1924; Wiedmer-Stern 1904

The burial of Burgäschisee was discovered in 1902 near the shore of the lake Burgäschisee. During 1902 and 1943 some human remains were found. In total inhumation of possibly three individuals could be recovered. After the original description, one individual belongs to the Neolithic period and was buried in crouched position. Not all bones of the skeletons were recovered and preserved. The sample of a femur fragment did not provide enough DNA for subsequent analyses and was excluded from population genetic analysis. Samples were provided by the Archaeological Service of the canton of Bern.

### **CH Seengen 2463-2274 BC (2sigma cal.)**

Bleuer et al. 2012

The remains of a stone cist by Seengen was excavated in 1993. The burial contained two individuals, one of them consisted only of cremated remains. The grave structure is archaeologically dated to the Bronze Age. A petrous bone of the unburned human was used for DNA analyses. . Samples were provided by the Archaeological Service of the canton of Argau.

## Supplementary Note 2: Radiocarbon dating of the newly sequenced individuals

Every individual sequenced in this study was radiocarbon dated (SI table 1). For the individuals 1, 6/14, 7/11, 9, 10/16 and 13/18 the C<sup>14</sup> dates from the original publication were adopted (**Doppler 2012**). Samples for the new radiocarbon dates were always taken from the same skeletal element (petrous bone, femur or tooth) from which the bone powder for DNA extraction was taken.

The dating was conducted in the LARA (Laboratory for the Analysis of Radiocarbon with AMS) at the University of Bern. The individuals from Oberbipp were also dated at the Curt-Engelhorn-Zentrum in Mannheim. In case of large differences between the results of the two measurements, samples were dated a third time at the ORAU (Oxford Radiocarbon Accelerator Unit) in Oxford (**Steuri et al. 2019**).

All burials are far from coastal areas, therefore the reservoir effect due to the consumption of marine fish can be neglected since reservoir effects in freshwater lakes are not detectable so far. Furthermore, the studied populations were retrieved from burials offsite lake shores. Even though many Neolithic settlements in Switzerland were found at the lake shores, the burials are usually not associated with or in close proximity to them. In addition, the data collected for these settlements indicates a high proportion of husbandry and only limited fish consumption. This is also supported by stable isotope analysis of the studied individuals (**Siebke et al 2019**). Therefore, any possible bias based on “hard water effect” can be neglected as well.

## Supplementary Note 3: Mitochondrial genome reconstruction

All libraries were enriched for mtDNA following the procedure described in **Futwängler et al. 2018** and sequenced on an Illumina HiSeq at the Max Planck Institute for the Science of Human History in Jena. After processing the raw reads with EAGER (**Peltzer et al 2016**) contamination estimates and consensus sequences were computed with *schmutzi* (**Renaud et al. 2015**). Shared haplotypes were identified using MEGA-X and haplogroups were determined using *haplogrep* (**Weissensteiner et al. 2016**, SI Tab. 1). Percentual portions of the makrohaplogroups N1a, W, X, H, T2, J, U2, U3, U4, U5a, U5b, K, and U8 were calculated for each site (SI Fig. 1).

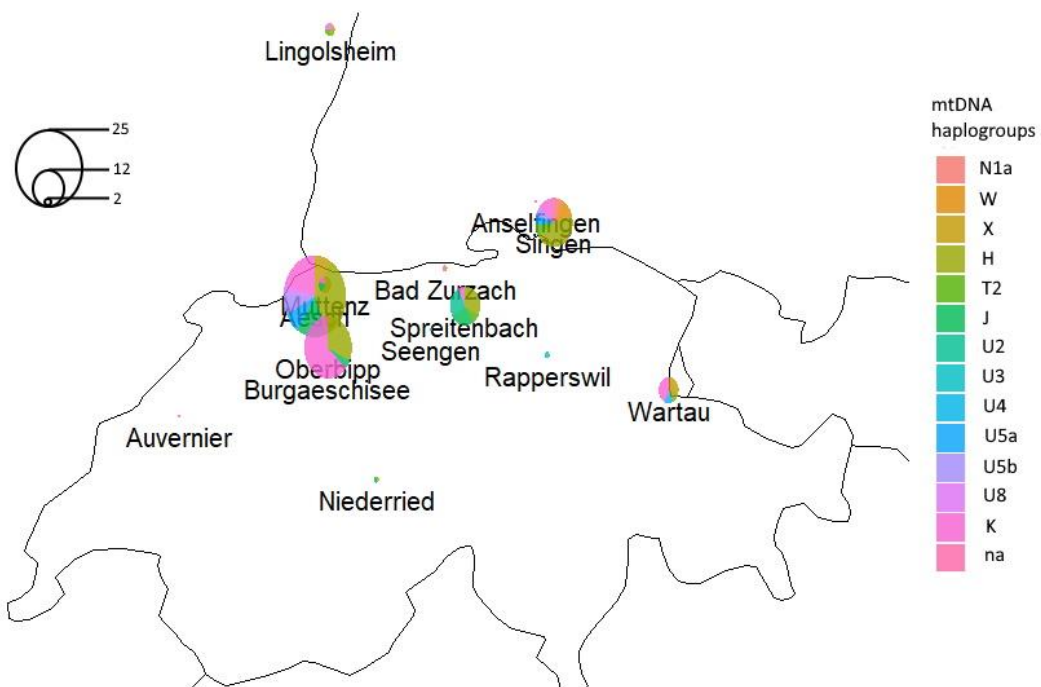

**Supplementary Figure 1 | Composition of the mtDNA haplogroups N1a, W, X, H, T2, J, U2, U3, U4, U5a, U5b and U8 for each site.** The size of the circles indicates the sample size for each site. Map generated with R version 3.4.3 (R Core Team 2017) using the CIA World Data Bank II is currently (mid-2003) available from <http://www.evl.uic.edu/pape/data/WDB/>

## Supplementary Note 4: Y-chromosomal haplogroup assignment

Assignment for Y-chromosomal haplogroups was performed via visual inspection of the captured SNPs, following the nomenclature of the International Society of Genetic Genealogy (ISOGG) version 14.218 (retrieved 19 November 2019, <http://www.isogg.org>).

In individuals older than 2600 BC originating from the sites of Oberbipp, Aesch and Muttenz only haplogroups belonging to the clades I2a and G2a were found. Besides the youngest Aesch individual Aesch25, which carries a R1b haplogroup.

In the younger site of Spreitenbach associated with the Corded Ware complex only haplogroups of the clades I2c and I2a are present. In the contemporaneous sample from Lingolsheim R1b could be determined.

All samples in the dataset younger than 2200 BC all individuals carry R1b, beside MX265 from Singen, which belongs to R1a.

**Supplementary Table 1 | Y chromosomal haplogroup assignment for all male individuals**

| ID      | Site                  | Cal 2 sigma BC | Terminal derived mutation | YHG         |
|---------|-----------------------|----------------|---------------------------|-------------|
| Aesch1  | Aesch (CH)            | 3090-2917      | PF3239                    | G2a2a1a2a1  |
| Aesch12 | Aesch (CH)            | 3010-2884      | PF3239                    | G2a2a1a2a1  |
| Aesch13 | Aesch (CH)            | 3016-2901      | PF3239                    | G2a2a1a2a1  |
| Aesch14 | Aesch (CH)            | 3014-2898      | PF3239                    | G2a2a1a2a1  |
| Aesch17 | Aesch (CH)            | 3011-2889      | PF3239                    | G2a2a1a2a1  |
| Aesch19 | Aesch (CH)            | no collagen    | PF3239                    | G2a2a1a2a1  |
| Aesch20 | Aesch (CH)            | 2913-2878      | FGC7739/Z6488             | G2a2a1a2a   |
| Aesch21 | Aesch (CH)            | no collagen    | PF3239                    | G2a2a1a2a1  |
| Aesch22 | Aesch (CH)            | 2892-2694      | PF3239                    | G2a2a1a2a1  |
| Aesch23 | Aesch (CH)            | 2881-2676      | PF3239                    | G2a2a1a2a1  |
| Aesch24 | Aesch (CH)            | 2912-2877      | FGC7739/Z6488             | G2a2a1a2a   |
| Aesch25 | Aesch (CH)            | 2864-2501      | L51/M412/PF6536/S1        | R1b1a1b1a1a |
| Aesch4  | Aesch (CH)            | 3094-2926      | PF3239                    | G2a2a1a2a1  |
| Aesch6  | Aesch (CH)            | 2905-2759      | PF3147                    | G2a2a       |
| Aesch7  | Aesch (CH)            | no collagen    | FGC7739/Z6488             | G2a2a1a2a   |
| MX150   | Oberbipp Horgen (CH)  | 3244-3102      | L91/PF3246/S285           | G2a2a1a2    |
| MX182   | Oberbipp Horgen (CH)  | 3338-3031      | PF3239                    | G2a2a1a2a1  |
| MX183   | Oberbipp Horgen (CH)  | 3344-3037      | FGC7739/Z6488             | G2a2a1a2a   |
| MX187   | Oberbipp Horgen (CH)  | 3337-2908      | PF3239                    | G2a2a1a2a1  |
| MX188   | Spreitenbach CWC (CH) | 2495-2399      | M423                      | I2a1a2      |
| MX190   | Spreitenbach CWC (CH) | 2860 - 2460    | M423                      | I2a1a2      |
| MX191   | Spreitenbach CWC (CH) | 2570 - 2190    | M423                      | I2a1a2      |
| MX192   | Spreitenbach CWC (CH) | 2571-2513      | M423                      | I2a1a2      |
| MX195   | Spreitenbach CWC (CH) | 2470 - 2050    | M423                      | I2a1a2      |
| MX204   | Oberbipp Horgen (CH)  | no collagen    | FGC7739/Z6488             | G2a2a1a2a   |
| MX209   | Oberbipp Horgen (CH)  | no collagen    | PF3239                    | G2a2a1a2a1  |

| ID    | Site                           | Cal 2 sigma BC                       |                     | YHG            |
|-------|--------------------------------|--------------------------------------|---------------------|----------------|
| MX210 | Oberbipp Horgen (CH)           | no collagen                          | PF3239              | G2a2a1a2a1     |
| MX211 | Oberbipp Horgen (CH)           | 3100-2928                            | PF3239              | G2a2a1a2a1     |
| MX212 | Oberbipp Horgen (CH)           | 3323-2581                            | PF3239              | G2a2a1a2a1     |
| MX213 | Oberbipp Horgen (CH)           | 3363-2930                            | PF3239              | G2a2a1a2a1     |
| MX219 | Oberbipp Horgen (CH)           | 3330-3216                            | PF3147              | G2a2a          |
| MX252 | Singen (D)                     | 1941-1774                            | L2/S139             | R1b1a1b1a1a2b1 |
| MX254 | Singen (D)                     | no collagen                          | L2/S139             | R1b1a1b1a1a2b1 |
| MX257 | Singen (D)                     | 1879-1696                            | L2/S139             | R1b1a1b1a1a2b1 |
| MX258 | Singen (D)                     | 2028-1903                            | P312/PF6547/S116    | R1b1a1b1a1a2   |
| MX259 | Anselfingen (D)                | 2456-2203                            | P312/PF6547/S116    | R1b1a1b1a1a2   |
| MX265 | Singen (D)                     | 763-431                              | L146/M420/PF6229    | R1a            |
| MX270 | Singen (D)                     | no collagen                          | L2/S139             | R1b1a1b1a1a2b1 |
| MX275 | Singen (D)                     | 2135-1961                            | L2/S139             | R1b1a1b1a1a2b1 |
| MX279 | Singen (D)                     | 1882-1745                            | L2/S139             | R1b1a1b1a1a2b1 |
| MX283 | Singen (D)                     | 2116-1926                            | L2/S139             | R1b1a1b1a1a2b1 |
| MX286 | Singen (D)                     | 2029-1892                            | L2/S139             | R1b1a1b1a1a2b1 |
| MX288 | Singen (D)                     | 2199-2028                            | L2/S139             | R1b1a1b1a1a2b1 |
|       |                                |                                      | P303/Page108/PF3340 |                |
| MX298 | Wartau (CH)                    | 2620-2448                            | /S135/Z765          | G2a2b2a        |
| MX299 | Oberbipp Horgen (CH)           | 2910-2679                            | PF3147              | G2a2a          |
|       |                                | 2866-2601 date<br>from individual of | CTS5330             |                |
| MX304 | Auvernier (CH)                 | the same burial                      |                     | R1b1a2a1a      |
| RA58  | Muttentz (CH)                  | 2937-2886                            | FGC7739/Z6488       | G2a2a1a2a      |
| RA61  | Muttentz (CH)                  | 2905-2865                            | PF3239              | G2a2a1a2a1     |
| RA62  | Muttentz (CH)                  | 2921-2886                            | PF3239              | G2a2a1a2a1     |
| RA63  | Zuzach (CH)                    | 2046-1946                            | L2/S139             | R1b1a1b1a1a2b1 |
| RA64  | Zuzach (CH)                    | 2206-2126                            | L2/S139             | R1b1a1b1a1a2b1 |
| SX10  | Rapperswill Zürichstrasse (CH) | new-born or unborn<br>baby of SX8    | L166                | G2a2a1a2a1a    |
| SX11  | Niederried Ursisbalm (CH)      | 4458 - 4362                          | PF3239              | G2a2b2a1a1     |
| SX20  | Wartau (CH)                    | 1693-1609                            | P312/PF6547/S116    | R1b1a1b1a1a2   |
| SX29  | Lingolsheim (F)                | no collagen                          | M423                | I2a1a2         |
| SX32  | Lingolsheim (F)                | 2463-2208                            | P310/PF6546/S129    | R1b1a1b1a1     |
| SX33  | Lingolsheim (F)                | 4766-4601                            | L161.1/S185.1       | I2a1a2a        |



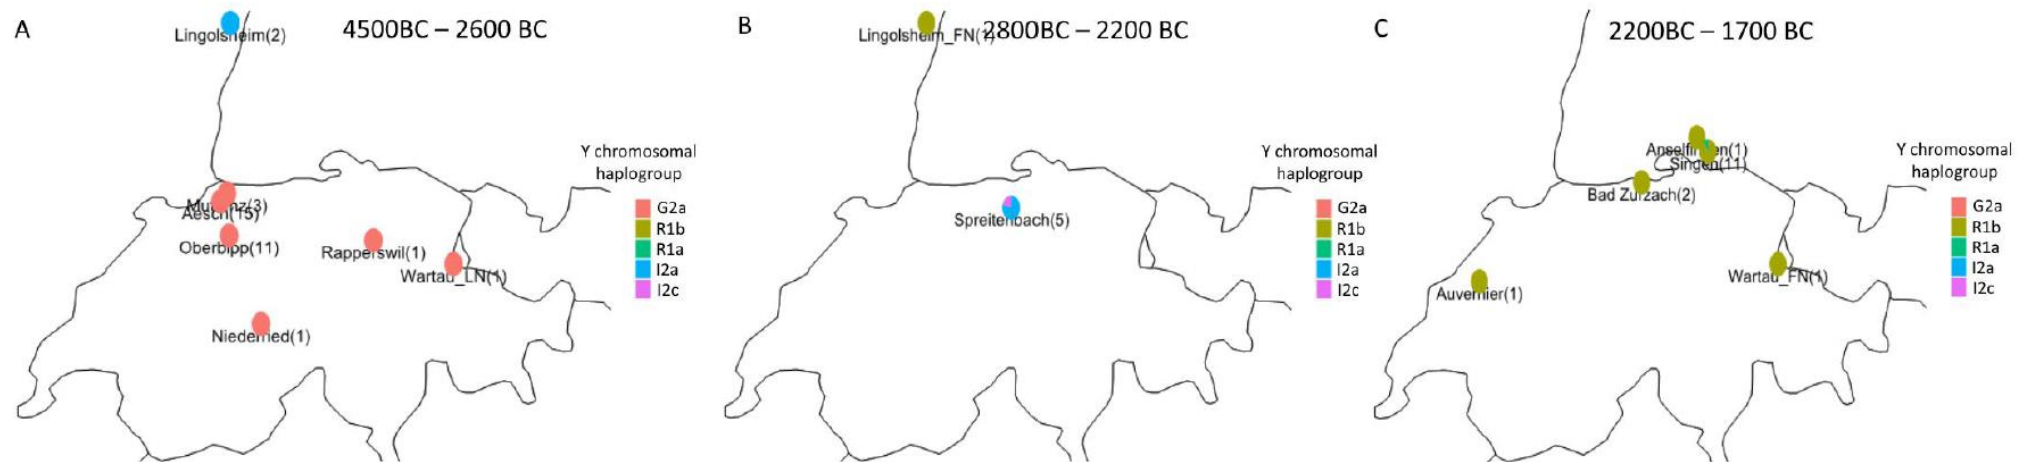

**Supplementary Figure 2 | Composition of the Y chromosomal haplogroups for each site at different time spans.** Map generated with R version 3.4.3 (R Core Team 2017) using the CIA World Data Bank II is currently (mid-2003) available from <http://www.evl.uic.edu/pape/data/WDB/>.

## Supplementary Note 5: ADMIXTURE Analysis

A dataset of all newly sequenced ancient individuals from Switzerland and 275 already published ancient genomes as well as modern populations from the HO dataset were used for ADMIXTURE (version 1.3) analysis. Before starting the analysis, the dataset was pruned for LD using PLINK version v1.07 and the parameters `--indep-pairwise 200 25 0.5`.

The ADMIXTURE software was run in unsupervised mode and the optimal number of  $k$  was determined using ADMIXTURE's cross-validation procedure (SI Fig 3).

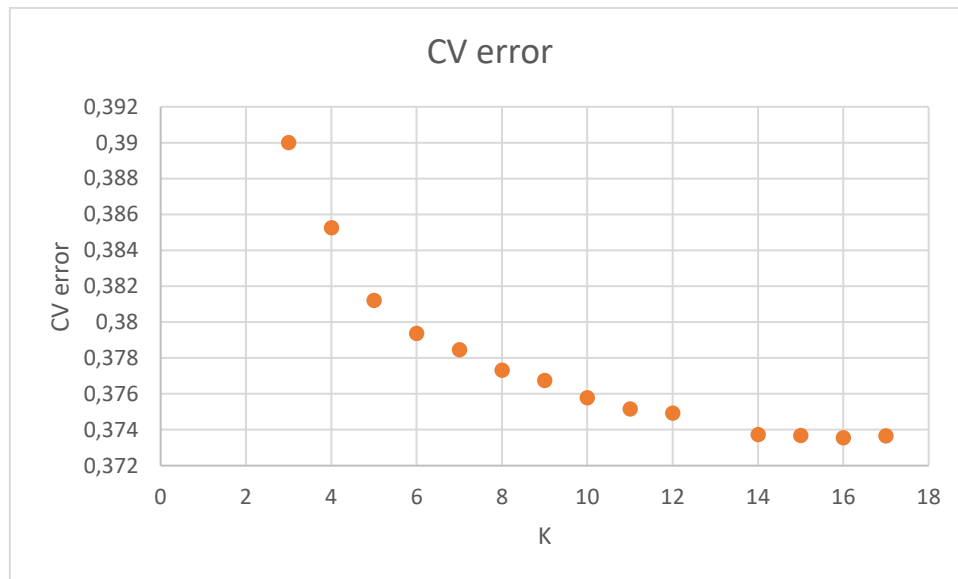

**Supplementary Figure 3 | CV error for  $k$  between 3 and 17.** The lowest CV value can be found for  $k=16$ .

As  $k=16$  produced the lowest CV values, the results of this clustering were plotted (SI Fig 4). These results represent the individuals from sites older than 2700 BCE as a mixture of clusters being similar to the Earls Farmers from Anatolia and WHG. Individuals from sites younger than 2700 BCE also show one additional ancestry cluster which can also be found in Yamnaya individuals from the Pontic Steppe.

**Supplementary Figure 4 | Unsupervised ADMIXTURE plot (k=16) of the newly sequenced ancient Swiss individuals and selected published ancient genomes.** The clustering supports the results of the PCA plot, displaying the ancient Swiss individuals as a mixture of Anatolian Farmers and WHG for sites older than 2700 BCE and showing additional ancestry in the sites younger than 2700 BCE being similar to Yamnaya-like individuals from the Pontic Steppe.

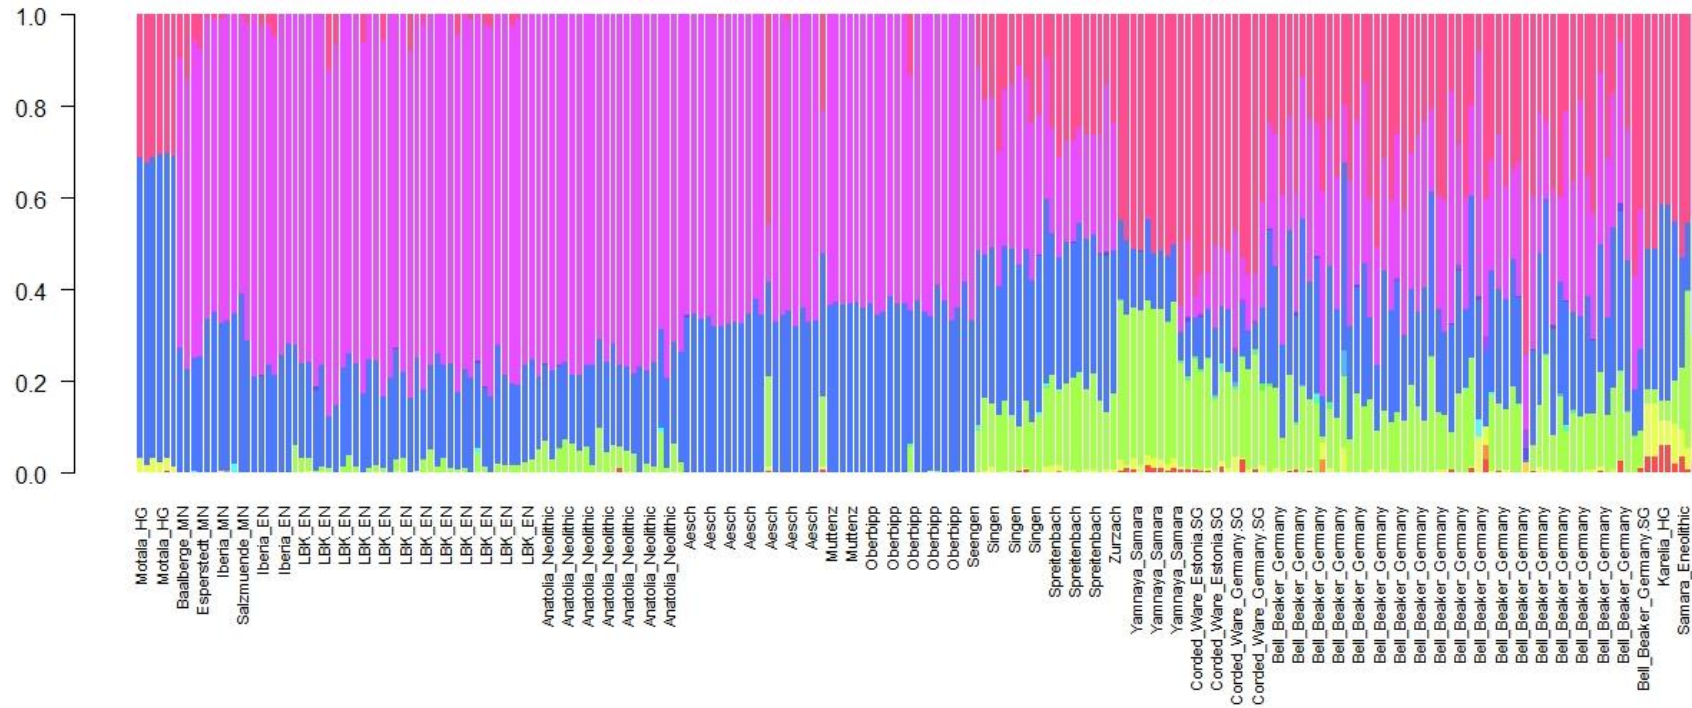

## Supplementary Note 6: Sex-biased Admixture

To assess, if the admixture process between Late Neolithic individuals and immigrants with 'steppe'-related ancestry shows any sex-bias,  $f_3$  statistics of the form (Mbuti; Source; Test) using  $qp3Pop$  from ADMIXTOOLS (<https://github.com/DReichLab>) were performed on the autosomal SNPs of the HO panel and on 34,207 X chromosomal SNPs that represent the intersect of position on the X chromosome that are covered sufficiently in the individuals from the Final Neolithic sites: Singen, Spreitenbach, and Wartau\_FN. As source Corded\_Ware\_Germany, Yamnaya\_Samara, Globular\_Amphora, and the Late Neolithic Swiss Sites were tested, similar to the approach described in (Saag et al. 2017).

The Late Neolithic individuals from our study (Spreitenbach, Singen, and Wartau\_FN) are relatively symmetrically related to the sources Swiss\_LN and Globular\_Amphora when comparing X chromosomes to autosomes. Relative to this the Late Neolithic Swiss individuals or our study have a higher affinity on the autosomes than on the X chromosome using the sources CWC and Yamnaya\_Samara. The observed effect is stronger using Yamnaya\_Samara as a source than when CWC is used. These results suggest that the influence of the steppe was stronger on the male side (SI Fig. 5). These results match the results of previously published data (Saag et al. 2017).

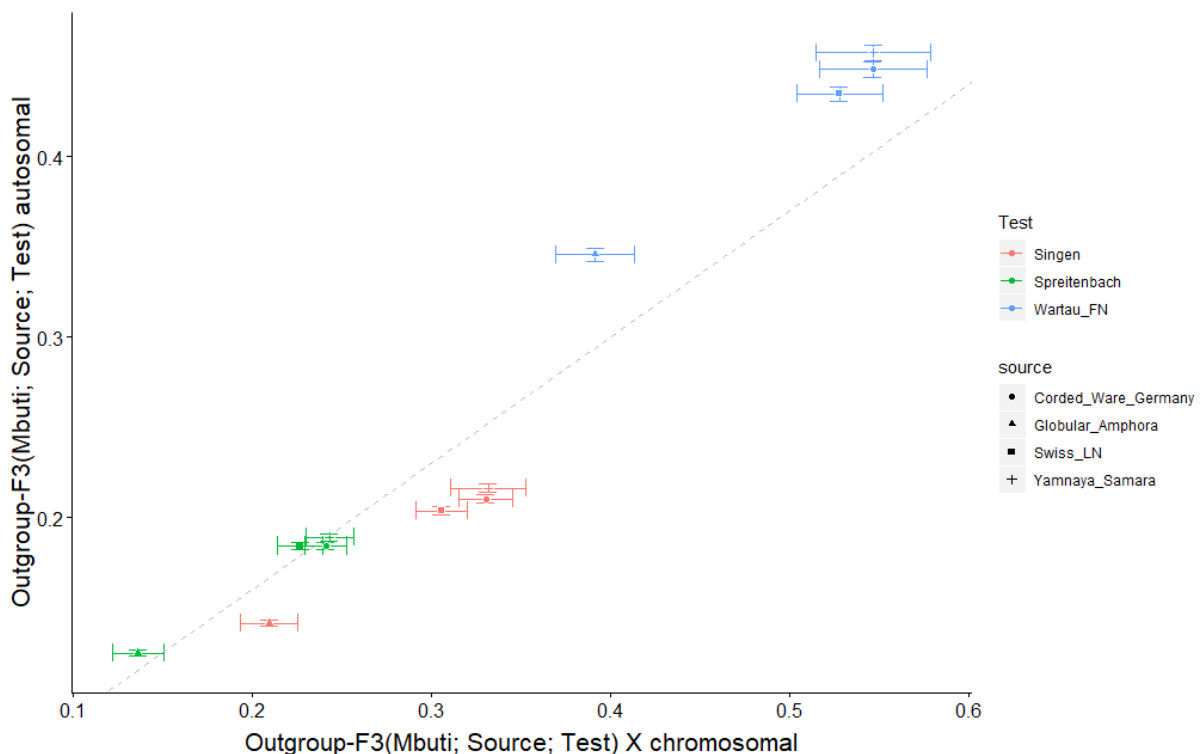

**Supplementary Figure 5 | Sex-biased admixture patterns in Final Neolithic Swiss individuals.**  $F_3$  values of statistics of the form (Mbuti; Source; Test) for autosomes and the X chromosome. Error bars represent standard deviation of the  $f_3$  statistics.

## Supplementary Note 7: Proportions of steppe ancestry on individual level

Relative proportions of ancestry components were estimated using *qpAdm* from ADMIXTOOLS (<https://github.com/DReichLab>).

Each individual's ancestry was modelled using a three-way model with the reference populations WHG, Anatolia Neolithic (ANF) and Yamnaya Samara (YAM). Subsequently, the best supported minimal model was selected and if necessary, thus for individuals for which a two-way model was better supported with either omitting ANF or WHG, the corresponding two-way model was rerun. In cases where also the two-way model was rejected Yamnaya proportions were set either to 0 or 1. Individuals with less than 100k SNPs were filtered out.

As seen in SI Figure 6 before 2800 BC the steppe component is absent in Central Europe. The earliest individuals with proportions of steppe ancestry greater than zero can be found in the Swiss dataset. However, the ancient Dataset from Great Britain and the MES region in Germany show larger gaps for this specific time span might also biasing the results.

In all regions, an increase of the steppe component around 2500 BC can be seen.

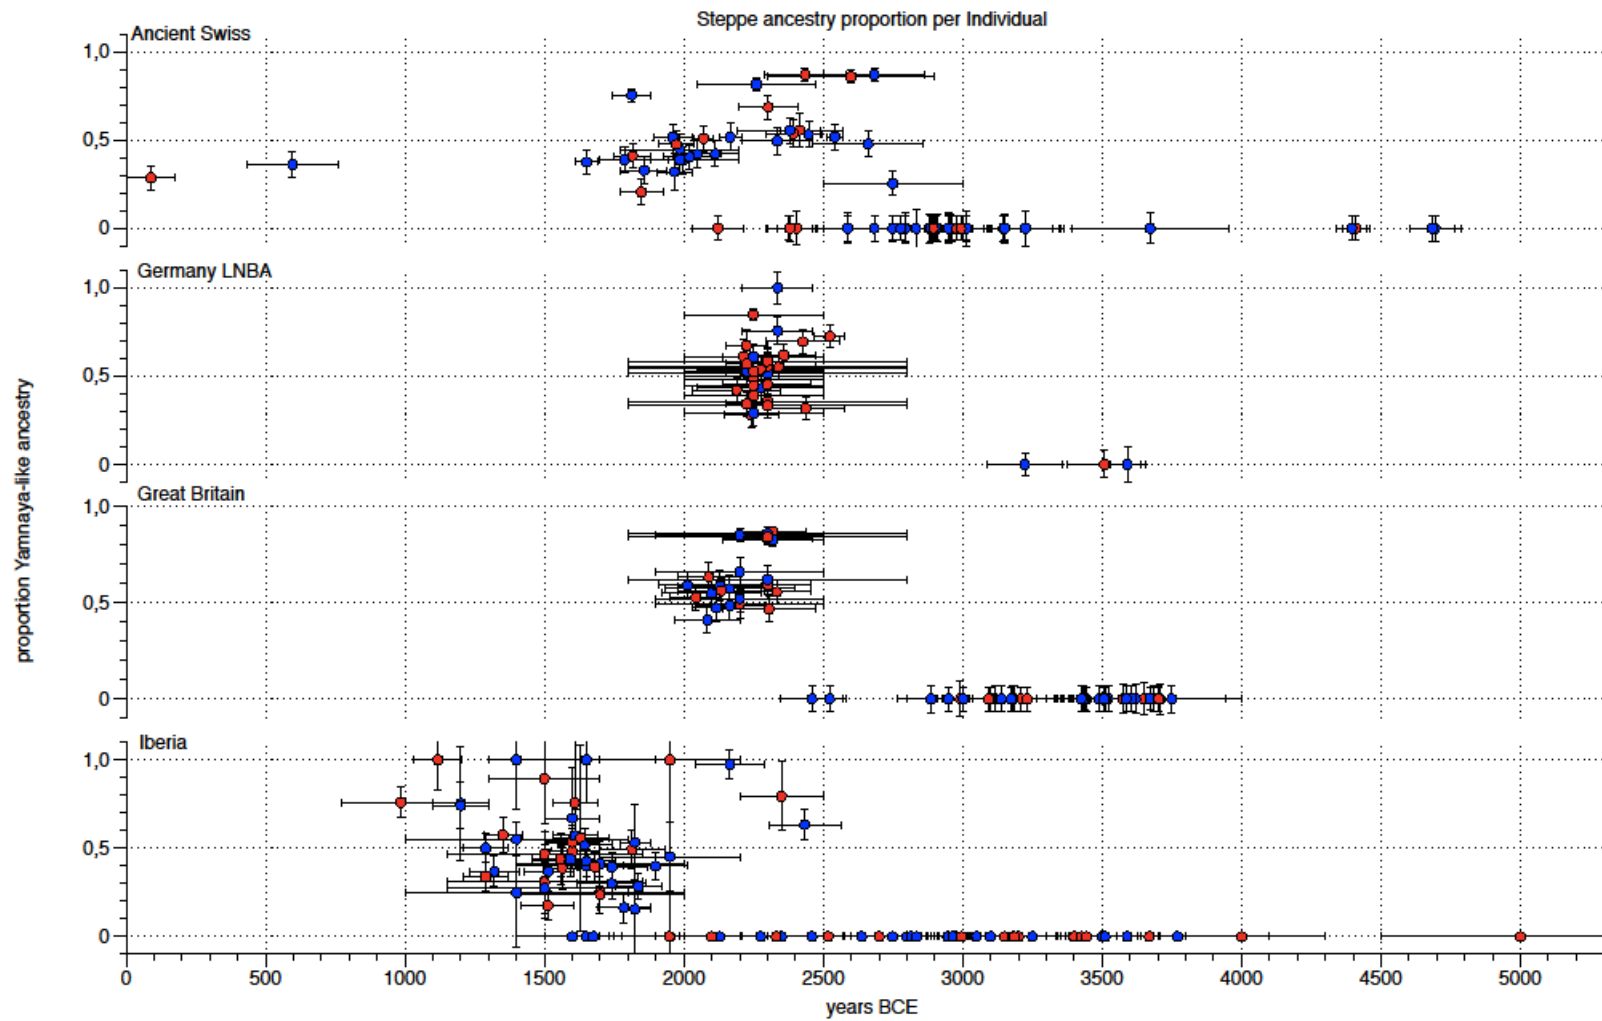

**Supplementary Figure 6 | Relative proportions of steppe ancestry in each individual over time.** We used *qpAdm* to estimate the proportion of steppe ancestry in each individual. Red dots female individuals and blue dots male individuals. Horizontal error bars represent ranges of C14 dates and vertical error bars represent standard errors of the steppe-related ancestry.

Supplementary Note 8: Estimated arrival time of the steppe component in the different regions

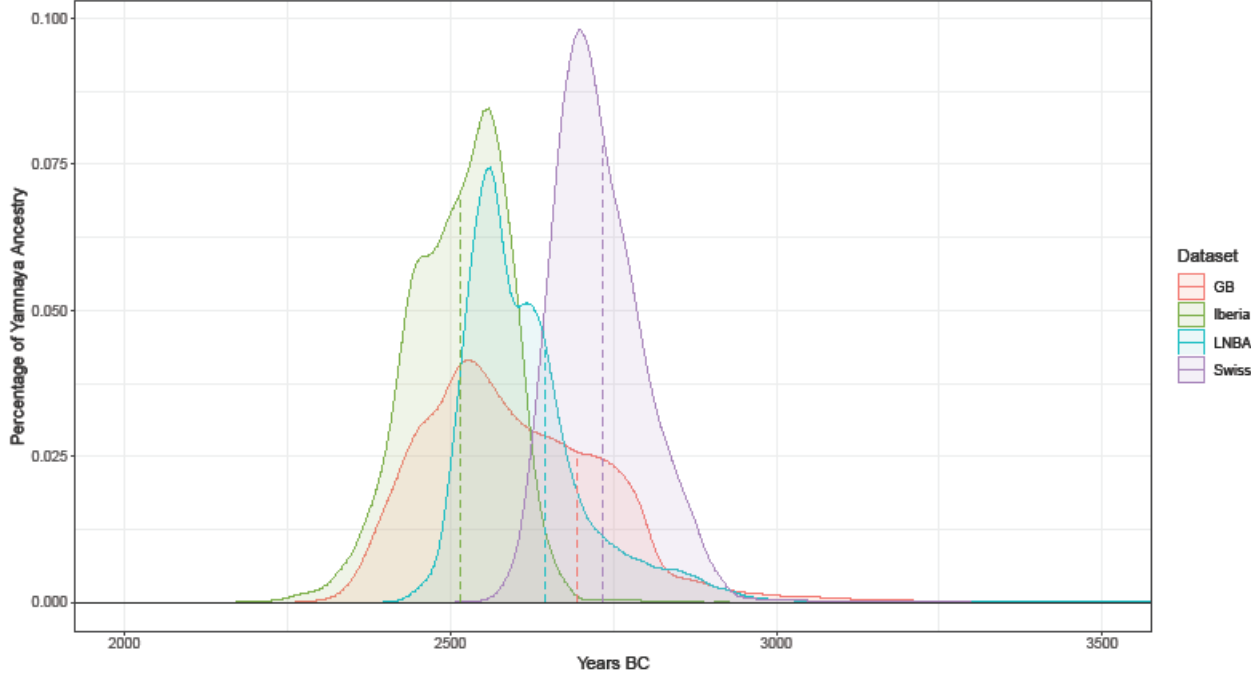

**Supplementary Figure 7 | Density plots of the percentage of Yamnaya ancestry in each individual of the regions Great Britain, Iberia, Switzerland, and Germany. The earliest increase can be detected in Switzerland.**

**Supplementary Table 2 | qpAdm admixture models for the individuals of each site.** P-values greater than 0.05 (model is not rejected) marked in green.

Test: WHG Anatolia\_Neolithic Yamnaya\_Samara

Using the right outgroups: Mbuti Ust\_Ishim\_HG\_published.DG Ethiopia\_4500BP.SG MA1\_HG.SG Villabruna Papuan Onge Han Karitiana

| Population          | WHG  | Anatolia N | Yamnaya | SD (WHG) | SD (Anatolia N) | SD (Yamnaya) | tail prob (000) | tail prob (001) | tail prob (010) | tail prob (100) |
|---------------------|------|------------|---------|----------|-----------------|--------------|-----------------|-----------------|-----------------|-----------------|
| Bell_Beaker_Germany | 0,16 | 0,40       | 0,44    | 0,01     | 0,02            | 0,02         | 0,022           | 0,000           | 0,000           | 0,000           |
| Corded_Ware_Germany | 0,11 | 0,22       | 0,66    | 0,17     | 0,04            | 0,04         | 0,348           | 0,000           | 0,000           | 0,000           |
| LBK_EN              | 0,06 | 0,94       | 0,00    | 0,01     | 0,02            | 0,00         | 0,105           | 0,158           | 0,000           | 0,000           |
| Auvernier           | 0,00 | 0,79       | 0,21    | 0,00     | 0,14            | 0,14         | 0,249           | 0,212           | 0,000           | 0,316           |
| Burgäschisee        | 0,00 | 0,70       | 0,30    | 0,00     | 0,15            | 0,16         | 0,656           | 0,355           | 0,002           | 0,764           |
| Spreitenbach        | 0,14 | 0,38       | 0,48    | 0,02     | 0,03            | 0,03         | 0,014           | 0,000           | 0,000           | 0,000           |
| Anselfingen         | 0,15 | 0,32       | 0,54    | 0,04     | 0,09            | 0,09         | 0,022           | 0,000           | 0,000           | 0,000           |
| Singen              | 0,19 | 0,42       | 0,39    | 0,02     | 0,03            | 0,03         | 0,126           | 0,000           | 0,000           | 0,000           |
| Oberbipp_F          | 0,22 | 0,76       | 0,02    | 0,05     | 0,09            | 0,09         | 0,986           | 0,987           | 0,000           | 0,000           |
| Lingolsheim_FN      | 0,14 | 0,39       | 0,47    | 0,04     | 0,08            | 0,08         | 0,274           | 0,000           | 0,000           | 0,000           |
| Wartau_FN_1         | 0,17 | 0,44       | 0,39    | 0,02     | 0,06            | 0,06         | 0,621           | 0,000           | 0,000           | 0,000           |
| Wartau_R            | 0,14 | 0,59       | 0,27    | 0,03     | 0,07            | 0,07         | 0,450           | 0,005           | 0,000           | 0,000           |
| Zurzach             | 0,18 | 0,38       | 0,44    | 0,03     | 0,06            | 0,06         | 0,719           | 0,000           | 0,000           | 0,000           |
| Lingolsheim_MN      | 0,20 | 0,80       | 0,00    | 0,02     | 0,05            | 0,00         | 0,209           | 0,275           | 0,00            | 0,000           |
| Muttenz             | 0,27 | 0,72       | 0,00    | 0,02     | 0,04            | 0,00         | infeasible      | 0,227           | 0,000           | infeasible      |
| Niederried          | 0,22 | 0,78       | 0,00    | 0,02     | 0,05            | 0,00         | infeasible      | 0,249           | 0,000           | infeasible      |
| Oberbipp            | 0,28 | 0,73       | 0,00    | 0,02     | 0,03            | 0,00         | infeasible      | 0,123           | 0,000           | infeasible      |
| Seengen             | 0,26 | 0,74       | 0,00    | 0,05     | 0,11            | 0,00         | 0,304           | 0,395           | 0,000           | 0,000           |
| Rapperswil          | 0,21 | 0,79       | 0,00    | 0,03     | 0,06            | 0,00         | infeasible      | 0,062           | 0,000           | infeasible      |
| Wartau_LN           | 0,20 | 0,80       | 0,00    | 0,03     | 0,07            | 0,00         | infeasible      | 0,579           | 0,000           | 0,000           |
| Wartau_FN_2         | 0,15 | 0,85       | 0,00    | 0,02     | 0,05            | 0,00         | infeasible      | 0,200           | 0,000           | infeasible      |
| Aesch               | 0,26 | 0,74       | 0,00    | 0,01     | 0,03            | 0,03         | 0,135           | 0,162           | 0,000           | 0,000           |



**Supplementary Table 3 | DATES results on individual level with Yamnaya\_Samara and Swiss\_LN as sources**

| Sample | Site         | sex | maxageBP | minageBP | ageBP | mean generations | generations  | gen +/- | maxgen | mingen |
|--------|--------------|-----|----------|----------|-------|------------------|--------------|---------|--------|--------|
| MX188  | Spreitenbach | m   | 2495     | 2399     | 2447  | 22,91            | 19,13        | 11,29   | 30,42  | 7,84   |
| MX190  | Spreitenbach | m   | 2860     | 2460     | 2660  | 495,46           | 407,65       | 360,26  | 767,91 | 47,39  |
| MX192  | Spreitenbach | m   | 2571     | 2513     | 2542  | 186,36           | 130,21       | 75,12   | 205,32 | 55,09  |
| MX195  | Spreitenbach | m   | 2470     | 2050     | 2260  | 6,90             | 6,01         | 3,33    | 9,34   | 2,69   |
| MX197  | Spreitenbach | f   | 2490     | 2294     | 2392  | 14,56            | 14,89        | 2,14    | 17,03  | 12,75  |
| MX198  | Spreitenbach | f   | 2900     | 2300     | 2600  | 7,81             | 8,63         | 3,40    | 12,03  | 5,22   |
| MX199  | Spreitenbach | f   | 2409     | 2197     | 2303  | 9,38             | 6,79         | 7,41    | 14,19  | -0,62  |
| MX252  | Singen       | m   | 1941     | 1774     | 1858  | 111,38           | 82,75        | 62,19   | 144,94 | 20,56  |
| MX254  | Singen       | m   | 2199     | 1774     | 1987  | 50,43            | 48,08        | 17,76   | 65,85  | 30,32  |
| MX257  | Singen       | m   | 1879     | 1696     | 1788  | 54,99            | 50,92        | 14,58   | 65,50  | 36,34  |
| MX259  | Anselfingen  | m   | 2456     | 2203     | 2330  | 10,10            | 8,54         | 7,62    | 16,16  | 0,92   |
| MX270  | Singen       | m   | 2199     | 1774     | 1987  | 30,51            | 23,85        | 13,54   | 37,39  | 10,32  |
| MX275  | Singen       | m   | 2135     | 1961     | 2048  | 39,76            | 36,18        | 18,40   | 54,58  | 17,78  |
| MX279  | Singen       | m   | 1882     | 1745     | 1814  | 35,74            | 113,66       | 74,86   | 188,53 | 38,80  |
| MX280  | Singen       | f   | 2035     | 1910     | 1973  | 35,84            | 31,70        | 9,83    | 41,53  | 21,87  |
| MX283  | Singen       | m   | 2116     | 1926     | 2021  | 18,75            | 1,77         | 14,71   | 16,48  | 0,00   |
| MX288  | Singen       | m   | 2199     | 2028     | 2114  | 68,01            | 43,70        | 39,60   | 83,30  | 4,10   |
| RA63   | Zurzach      | m   | 2046     | 1946     | 1996  | 13,58            | 12,69        | 4,15    | 16,84  | 8,55   |
| RA64   | Zurzach      | m   | 2206     | 2126     | 2166  | 16,54            | 16,90        | 4,41    | 21,31  | 12,49  |
| SX20   | Wartau       | m   | 1693     | 1609     | 1651  | 17,96            | 15,25        | 6,00    | 21,25  | 9,25   |
| SX23   | Wartau       | f   | 1883     | 1749     | 1816  | 16,48            | 13,18        | 7,22    | 20,41  | 5,96   |
| SX26   | Wartau       |     | 2461     | 2295     |       | 30,77            | 28,76        | 13,385  | 42,15  | 15,38  |
| MX189  | Spreitenbach | f   | 2105     | 2036     | 2071  | 243,16           | wired number |         |        |        |
| MX191  | Spreitenbach | m   | 2570     | 2190     | 2380  | 437,29           | wired number |         |        |        |
| MX194  | Spreitenbach | f   | 2489     | 2344     | 2417  | 304,99           | wired number |         |        |        |
| MX196  | Spreitenbach | f   | 2580     | 2290     | 2435  | 5,71             | wired number |         |        |        |
| MX277  | Singen       | f   | 1926     | 1770     | 1848  | 34,16            | wired number |         |        |        |
| MX256  | Singen       | f   | 2132     | 1922     | 2027  | 0,00             | wired number |         |        |        |
| MX258  | Singen       | m   | 2028     | 1903     | 1966  | 28,90            | wired number |         |        |        |

|       |               |   |      |      |      |              |              |        |        |         |  |
|-------|---------------|---|------|------|------|--------------|--------------|--------|--------|---------|--|
| MX265 | Singen        | m | 763  | 431  | 597  | wired number | wired number |        |        |         |  |
| MX298 | Wartau        | m | 2620 | 2448 | 2534 | wired number | wired number |        |        |         |  |
| MX304 | Auvernier     | m | 2866 | 2601 | 2734 | 208,80       | wired number |        |        |         |  |
| MX310 | Burgaeschisee | m | 2862 | 2581 | 2722 | 135,01       | wired number |        |        |         |  |
| MX286 | Singen        | m | 2029 | 1892 | 1961 | 64,10        | -271,57      | 237,27 | -34,30 | -508,85 |  |
| MX251 | Singen        | f | 2197 | 1981 | 2089 | 5,12         | -134,78      | 109,41 | -25,38 | -244,19 |  |

**Supplementary Table 4 | DATES results for different regions**

| Region | Group               | Source1        | Source2           | C14 range max | C14 range min | generations | gen +/- |
|--------|---------------------|----------------|-------------------|---------------|---------------|-------------|---------|
| Swiss  | Spreitenbach_CWC    | Yamnaya_Samara | Swiss_LN          | 2900          | 2036          | 10,934      | 1,78    |
| Swiss  | Swiss_EBA           | Yamnaya_Samara | Swiss_LN          | 2456          | 1609          | 27,89       | 3,757   |
| MES    | Bell_Beaker_Germany | Yamnaya_Samara | MES_Neolithic     | 2625          | 2050          | 34,817      | 11,611  |
| Iberia | Bell_Beaker_Iberia  | Yamnaya_Samara | Iberia_MN         | 2800          | 1776          | 7,258       | 7,183   |
| GB     | Bell_Beaker_England | Yamnaya_Samara | England_Neolithic | 2800          | 1800          | 22,114      | 2,482   |
| MES    | Corded_Ware_Germany | Yamnaya_Samara | MES_Neolithic     | 2578          | 2033          | 26,722      | 9,641   |

**Supplementary Table 5 | Relatedness estimates using PMR, READ and lcMLkin for first and second degree related individuals**

| Ind1  | Ind2  | lcMLkin |        |        |        |        |        | READ          |         |         | PMR    |           |           | same MT DANN | same Y HG |
|-------|-------|---------|--------|--------|--------|--------|--------|---------------|---------|---------|--------|-----------|-----------|--------------|-----------|
|       |       | k0_hat  | k1_hat | k2_hat | pi_HAT | nbSNP  | r      | Relationship  | Z_upper | Z_lower | nSNPs  | nmismatch | pmismatch |              |           |
| MX270 | MX275 | 0,315   | 0,461  | 0,223  | 0,454  | 167647 | 0,4535 | First Degree  | 7,21    | -14,07  | 196616 | 38132     | 0.19394   | yes          | no        |
| MX209 | MX219 | 0,231   | 0,639  | 0,13   | 0,45   | 24866  | 0,4495 | First Degree  | 8,42    | -3,97   | 29551  | 5458      | 0.18470   | no           | no        |
| SX10  | SX8   | 0,13    | 0,847  | 0,023  | 0,446  | 124180 | 0,4465 | First Degree  | 9,44    | -13,34  | 145624 | 28231     | 0.19386   | yes          | na        |
| MX195 | MX197 | 0,119   | 0,873  | 0,008  | 0,445  | 294763 | 0,4445 | First Degree  | 3,92    | -20,07  | 356136 | 69688     | 0.19568   | yes          | na        |
| MX187 | MX212 | 0,13    | 0,852  | 0,018  | 0,444  | 175276 | 0,444  | First Degree  | 8,39    | -12,11  | 208924 | 39351     | 0.18835   | no           | no        |
| MX192 | MX197 | 0,12    | 0,873  | 0,007  | 0,443  | 285900 | 0,4435 | First Degree  | 4,75    | -20,44  | 344641 | 67734     | 0.19653   | yes          | na        |
| MX192 | MX195 | 0,334   | 0,476  | 0,19   | 0,428  | 268894 | 0,428  | First Degree  | 1,96    | -17,57  | 323615 | 63541     | 0.19635   | yes          | no        |
| MX188 | MX190 | 0,382   | 0,39   | 0,227  | 0,422  | 326168 | 0,422  | First Degree  | 2,89    | -18,45  | 394714 | 78180     | 0.19807   | yes          | no        |
| MX254 | MX286 | 0,166   | 0,828  | 0,006  | 0,42   | 329141 | 0,42   | First Degree  | 4,23    | -23,34  | 396702 | 78410     | 0.19765   | no           | no        |
| MX283 | MX286 | 0,185   | 0,807  | 0,007  | 0,411  | 340960 | 0,4105 | First Degree  | 5,46    | -24,03  | 411459 | 81328     | 0.19766   | no           | no        |
| MX275 | MX286 | 0,204   | 0,784  | 0,013  | 0,405  | 244748 | 0,405  | First Degree  | 3,41    | -23,07  | 291501 | 57925     | 0.19871   | no           | no        |
| MX150 | MX187 | 0,248   | 0,71   | 0,042  | 0,397  | 91284  | 0,397  | First Degree  | 8,22    | -12,18  | 109655 | 20743     | 0.18917   | no           | no        |
| MX254 | MX283 | 0,439   | 0,422  | 0,138  | 0,35   | 393973 | 0,349  | First Degree  | 6,13    | -16,49  | 477609 | 97660     | 0.20448   | yes          | yes       |
| MX183 | MX211 | 0,422   | 0,47   | 0,108  | 0,343  | 258399 | 0,343  | First Degree  | 0,69    | -19,35  | 310268 | 62928     | 0.20282   | yes          | no        |
| MX150 | MX209 | 0,577   | 0,346  | 0,077  | 0,25   | 72301  | 0,25   | Second Degree | 8,62    | -0,25   | 86029  | 18175     | 0.21127   | no           | no        |
| MX275 | MX283 | 0,577   | 0,407  | 0,016  | 0,22   | 286647 | 0,2195 | Second Degree | 5,68    | -10,40  | 343024 | 75468     | 0.22001   | no           | yes       |
| MX270 | MX286 | 0,614   | 0,357  | 0,028  | 0,207  | 189791 | 0,2065 | Second Degree | 3,75    | -11,33  | 223865 | 50077     | 0.22369   | no           | no        |
| MX254 | MX275 | 0,679   | 0,3    | 0,021  | 0,171  | 277631 | 0,171  | Second Degree | 2,92    | -13,44  | 331845 | 75516     | 0.22756   | no           | yes       |
| MX187 | MX219 | 0,754   | 0,193  | 0,054  | 0,15   | 30547  | 0,1505 | Second Degree | 2,92    | -3,09   | 36392  | 8053      | 0.22128   | no           | no        |
| MX187 | MX209 | 0,705   | 0,291  | 0,003  | 0,149  | 181634 | 0,1485 | Second Degree | 2,51    | -9,68   | 216996 | 48874     | 0.22523   | yes          | no        |
| MX150 | MX219 | 0,764   | 0,223  | 0,013  | 0,125  | 12304  | 0,1245 | Second Degree | 1,62    | -2,35   | 14706  | 3285      | 0.22338   | no           | no        |

|       |       |       |       |       |       |        |        |               |       |        |        |       |         |     |    |
|-------|-------|-------|-------|-------|-------|--------|--------|---------------|-------|--------|--------|-------|---------|-----|----|
| MX150 | MX212 | 0,82  | 0,121 | 0,059 | 0,12  | 70041  | 0,1195 | Second Degree | 1,76  | -6,66  | 83579  | 18906 | 0.22621 | no  | no |
| Aes3  | Aes12 | 0,123 | 0,863 | 0,014 | 0,445 | 279742 | 0,4455 | First Degree  | 12,41 | -16,25 | 331487 | 63428 | 0.19134 | yes | na |
| Aes3  | Aes24 | 0,583 | 0,41  | 0,008 | 0,213 | 325204 | 0,213  | Second Degree | 7,56  | -9,51  | 386396 | 84889 | 0.21969 | no  | na |
| Aes12 | Aes24 | 0,143 | 0,847 | 0,009 | 0,433 | 273774 | 0,4325 | First Degree  | 7,14  | -19,38 | 324166 | 62519 | 0.19286 | no  | na |
| Aes3  | Aes19 | 0,104 | 0,891 | 0,005 | 0,45  | 323734 | 0,4505 | First Degree  | 12,20 | -16,34 | 384537 | 73727 | 0.19173 | yes | na |
| Aes19 | Aes24 | 0,577 | 0,409 | 0,013 | 0,218 | 316956 | 0,2175 | Second Degree | 7,21  | -9,06  | 376691 | 82322 | 0.21854 | no  | na |
| Aes11 | Aes17 | 0,106 | 0,878 | 0,015 | 0,454 | 308832 | 0,454  | First Degree  | 11,54 | -16,95 | 366976 | 70202 | 0.1913  | no  | na |
| Aes14 | Aes15 | 0,106 | 0,878 | 0,015 | 0,454 | 193594 | 0,454  | First Degree  | 12,84 | -14,64 | 227595 | 43354 | 0.19049 | yes | na |
| Aes12 | Aes19 | 0,354 | 0,437 | 0,208 | 0,427 | 272655 | 0,4265 | First Degree  | 10,74 | -12,73 | 322847 | 61942 | 0.19186 | yes | na |

**Supplementary Table 6 | D-statistics.**

| Site           | lat        | lon       | steppe_ancestry | PopA          | PopB         | F4        | Z      | ka   | ka1  | ka2    |
|----------------|------------|-----------|-----------------|---------------|--------------|-----------|--------|------|------|--------|
| Spreitenbach   | 47,255     | 8,2158    | yes             | Swiss-French  | Swiss-German | 0,000114  | 2,056  | 6487 | 6476 | 98548  |
| Singen         | 47,767097  | 8,872239  | yes             | Swiss-French  | Swiss-German | 0,000053  | 0,865  | 5911 | 5906 | 89516  |
| Wartau_FN_1    | 47,45      | 9,292     | yes             | Swiss-French  | Swiss-German | -0,000015 | -0,196 | 4775 | 4776 | 72386  |
| Wartau_FN_2    | 47,45      | 9,292     | yes             | Swiss-French  | Swiss-German | -0,000025 | -0,336 | 4618 | 4619 | 70418  |
| Wartau_LN      | 47,45      | 9,292     | no              | Swiss-French  | Swiss-German | -0,000009 | -0,09  | 3387 | 3387 | 51365  |
| Lingolsheim_FN | 48,554457  | 7,681749  | yes             | Swiss-French  | Swiss-German | 0,000082  | 0,711  | 2262 | 2259 | 34356  |
| Anselfingen    | 47,854144  | 8,7737404 | yes             | Swiss-French  | Swiss-German | 0,00018   | 1,371  | 1754 | 1750 | 26337  |
| Zurzach        | 47,587789  | 8,293325  | yes             | Swiss-French  | Swiss-German | 0,000099  | 1,207  | 4199 | 4193 | 63804  |
| Burgaeschisee  | 47,101     | 7,406     | yes             | Swiss-French  | Swiss-German | -0,000355 | -1,425 | 307  | 309  | 4760   |
| Auvernier      | 46,5835    | 6,5245    | yes             | Swiss-French  | Swiss-German | 0,000193  | 0,763  | 330  | 329  | 5038   |
| Oberbipp       | 47,262067  | 7,659835  | no              | Swiss-French  | Swiss-German | -0,000057 | -0,967 | 6387 | 6393 | 96637  |
| Muttenz        | 47,3122    | 7,3843    | no              | Swiss-French  | Swiss-German | 0,000051  | 0,767  | 5401 | 5397 | 81812  |
| Seengen        | 47,1936    | 8,122     | no              | Swiss-French  | Swiss-German | -0,000435 | -2,626 | 821  | 826  | 12666  |
| Niederried     | 47,0117074 | 7,2505417 | no              | Swiss-French  | Swiss-German | -0,000198 | -2,57  | 5107 | 5122 | 77394  |
| Rapperswil     | 47,2266239 | 8,8184374 | no              | Swiss-French  | Swiss-German | 0,000079  | 0,814  | 2948 | 2944 | 44774  |
| Aesch          | 47,465413  | 7,601691  | no              | Swiss-French  | Swiss-German | -0,000063 | -1,138 | 6721 | 6767 | 102298 |
| Lingolsheim    | 48,554457  | 7,681749  | no              | Swiss-French  | Swiss-German | 0,000018  | 0,257  | 4622 | 4620 | 70266  |
| Spreitenbach   | 47,255     | 8,2158    | yes             | Swiss-Italian | Swiss-German | -0,000519 | 3,573  | 6516 | 6465 | 98548  |
| Singen         | 47,767097  | 8,872239  | yes             | Swiss-Italian | Swiss-German | -0,000534 | 3,665  | 5940 | 5893 | 89516  |
| Wartau_FN_1    | 47,45      | 9,292     | yes             | Swiss-Italian | Swiss-German | -0,000516 | 2,736  | 4798 | 4760 | 72386  |
| Wartau_FN_2    | 47,45      | 9,292     | yes             | Swiss-Italian | Swiss-German | -0,000042 | 0,239  | 4629 | 4627 | 70418  |
| Wartau_LN      | 47,45      | 9,292     | no              | Swiss-Italian | Swiss-German | -0,000233 | 1,023  | 3397 | 3385 | 51365  |
| Lingolsheim_FN | 48,554457  | 7,681749  | yes             | Swiss-Italian | Swiss-German | -0,001037 | 3,866  | 2280 | 2244 | 34356  |
| Anselfingen    | 47,854144  | 8,7737404 | yes             | Swiss-Italian | Swiss-German | -0,000695 | 2,09   | 1764 | 1746 | 26337  |
| Zurzach        | 47,587789  | 8,293325  | yes             | Swiss-Italian | Swiss-German | -0,000688 | 3,407  | 4223 | 4179 | 63804  |
| Burgaeschisee  | 47,101     | 7,406     | yes             | Swiss-Italian | Swiss-German | -0,000594 | 0,93   | 311  | 308  | 4760   |
| Auvernier      | 46,5835    | 6,5245    | yes             | Swiss-Italian | Swiss-German | -0,000898 | 1,316  | 334  | 329  | 5038   |
| Oberbipp       | 47,262067  | 7,659835  | no              | Swiss-Italian | Swiss-German | 0,000046  | -0,321 | 6401 | 6405 | 96637  |

|                |            |           |     |               |               |           |        |      |      |        |
|----------------|------------|-----------|-----|---------------|---------------|-----------|--------|------|------|--------|
| Muttenz        | 47,3122    | 7,3843    | no  | Swiss-Italian | Swiss-German  | -0,000092 | 0,561  | 5413 | 5405 | 81812  |
| Seengen        | 47,1936    | 8,122     | no  | Swiss-Italian | Swiss-German  | -0,000069 | 0,169  | 826  | 825  | 12666  |
| Niederried     | 47,0117074 | 7,2505417 | no  | Swiss-Italian | Swiss-German  | 0,000068  | -0,371 | 5121 | 5126 | 77394  |
| Rapperswil     | 47,2266239 | 8,8184374 | no  | Swiss-Italian | Swiss-German  | -0,000389 | 1,64   | 2959 | 2942 | 44774  |
| Aesch          | 47,465413  | 7,601691  | no  | Swiss-Italian | Swiss-German  | -0,000003 | 0,026  | 6738 | 6738 | 101710 |
| Lingolsheim    | 48,554457  | 7,681749  | no  | Swiss-Italian | Swiss-German  | 0,000099  | -0,534 | 4627 | 4633 | 70266  |
| Spreitenbach   | 47,255     | 8,2158    | yes | Swiss-French  | Swiss-Italian | -0,000405 | -2,978 | 6473 | 6513 | 98548  |
| Singen         | 47,767097  | 8,872239  | yes | Swiss-French  | Swiss-Italian | -0,000481 | -3,431 | 5897 | 5940 | 89516  |
| Wartau_FN_1    | 47,45      | 9,292     | yes | Swiss-French  | Swiss-Italian | -0,000531 | -3,006 | 4762 | 4801 | 72386  |
| Wartau_FN_2    | 47,45      | 9,292     | yes | Swiss-French  | Swiss-Italian | -0,000067 | -0,399 | 4629 | 4633 | 70418  |
| Wartau_LN      | 47,45      | 9,292     | no  | Swiss-French  | Swiss-Italian | -0,000241 | -1,126 | 3386 | 3399 | 51365  |
| Lingolsheim_FN | 48,554457  | 7,681749  | yes | Swiss-French  | Swiss-Italian | -0,000956 | -3,897 | 2246 | 2279 | 34356  |
| Anselfingen    | 47,854144  | 8,7737404 | yes | Swiss-French  | Swiss-Italian | -0,000515 | -1,649 | 1749 | 1762 | 26337  |
| Zurzach        | 47,587789  | 8,293325  | yes | Swiss-French  | Swiss-Italian | -0,000589 | -3,068 | 4183 | 4221 | 63804  |
| Burgaeschisee  | 47,101     | 7,406     | yes | Swiss-French  | Swiss-Italian | -0,000949 | -1,648 | 307  | 311  | 4760   |
| Auvernier      | 46,5835    | 6,5245    | yes | Swiss-French  | Swiss-Italian | -0,000705 | -1,099 | 329  | 333  | 5038   |
| Oberbipp       | 47,262067  | 7,659835  | no  | Swiss-French  | Swiss-Italian | -0,000011 | -0,079 | 6406 | 6407 | 96637  |
| Muttenz        | 47,3122    | 7,3843    | no  | Swiss-French  | Swiss-Italian | -0,000041 | -0,255 | 5409 | 5412 | 81812  |
| Seengen        | 47,1936    | 8,122     | no  | Swiss-French  | Swiss-Italian | -0,000504 | -1,273 | 823  | 829  | 12666  |
| Niederried     | 47,0117074 | 7,2505417 | no  | Swiss-French  | Swiss-Italian | -0,000131 | -0,75  | 5123 | 5133 | 77394  |
| Rapperswil     | 47,2266239 | 8,8184374 | no  | Swiss-French  | Swiss-Italian | -0,00031  | -1,389 | 2946 | 2959 | 44774  |
| Aesch          | 47,465413  | 7,601691  | no  | Swiss-French  | Swiss-Italian | -0,000066 | -0,52  | 6738 | 6745 | 101710 |
| Lingolsheim    | 48,554457  | 7,681749  | no  | Swiss-French  | Swiss-Italian | 0,000117  | 0,64   | 4636 | 4628 | 70266  |

## References

1. Tschumi, O. Die steinzeitlichen Hockergräber der Schweiz. Anzeiger für schweizerische Altertumskunde : Neue Folge Indicateur d'antiquités suisses : Nouvelle série 22 (1920)
2. Hug E. 1956. Die Anthropologische Sammlung im Naturhistorischen Museum Bern. In: Bern NM, editor. Bern: Naturhistorisches Museum Bern.
3. Schlaginhaufen O. 1924b. Das Hockerskelett von Ursibalm bei Niederried (Kt. Bern). Jahrbuch des Bernischen Historischen Museums in Bern:96-109.
4. Lichardus-Itten, M. Die Gräberfelder der Grossgartacher Gruppe im Elsaß (Habelt, Bonn, 1980)
5. Ramstein, M., Schimmelpfennig, D., Lösch, S. Ein neolithischer Dolmen an der Steingasse in Oberbipp. Archäologie Schweiz 37(3), 4-15 (2014).
6. Siebke, I. et al. The application of different 3D-scan-systems and photogrammetry at an excavation — A Neolithic dolmen from Switzerland. Digital Applications in Archaeology and Cultural Heritage 10, e00078; 10.1016/j.daach.2018.e00078 (2018)
7. Siebke I, Steuri N, Furtwängler A, Ramstein M, Arenz G, Hafner A, Krause J, and Lösch S. 2019. Who lived on the Swiss Plateau around 3300 BCE? - Analyses of commingled Human Skeletal Remains from the Dolmen of Oberbipp. International Journal of Osteoarchaeology. DOI: 10.1002/oa.2791
8. Bleuer E, Doppler T, Fetz H.. Gräber im näheren und weiteren Umfeld von Spreitenbach in Spreitenbach-Moosweg (Aargau, Schweiz): Ein Kollektivgrab um 2500 v Chr (ed. Doppler, T.) 233-266 (Basel 2012)
9. Löhlein W. Monumentale Grabanlagen der Steinzeit Megalithische Denkmale der Hochrheinregion. Denkmalpflege in Baden-Württemberg 3 2011
10. Stöckli WE, Niffeler U, and Gross-Klee E, editors. 1995. Neolithikum - Néolithique - Neolitico. SPM II. Basel. 385 p.
11. Schwegler U. 2016. Chronologie und Regionalität neolithischer Kollektivgräber in Europa und in der Schweiz Hochwald (Schweiz): LIBRUM Publishers & Editors LLC.
12. Bay R. 1936. Kiefer und Zähne aus dem neolithischen Steinkistengrab bei Aesch. Tätigkeitsbericht der Naturforschenden Gesellschaft Baselland 11 (1936-1938):22-30.
13. Doppler, T. Spreitenbach-Moosweg: ein Kollektivgrab um 2500 v. Chr. Archäologie Schweiz, Vol. 51 (2012).
14. Doswald C. Kaufmann B. Scheidegger S. Ein neolithisches Doppelhockergrab in Zurzach. Archäologie der Schweiz 12 (1989)
15. Grüniger I. and Kaufmann B. Ein Steinkistengrab von Rapperswil SG. Archäologie der Schweiz 5 (1982)
16. Stehrenberger T. Obere Höhle bei der "Procha Burg" Höhlenpost 148 (2016).
17. Stehrenberger T, Siebke I, and Lösch S. 2019. Sekundär bestattet oder «entsorgt»? Die Toten aus der Oberen Höhle Procha Burg (Wartau, Gretschins SG). In: Schweizerische Gesellschaft für Höhlenforschung, editor. Sinterlaken - Nationaler Kongress für Höhlenforschung Interlaken: accepted.
18. Stockhammer, P. W., Massy, K., Knipper, C., Friedrich, R., Kromer, B., Lindauer, S., et al. Rewriting the central European early bronze age chronology: Evidence from large-scale radiocarbon dating. PLoS One, 10(10), e0139705 (2015)



19. OELZE, V. M., NEHLICH, O. & RICHARDS, M. P. 'THERE'S NO PLACE LIKE HOME' -NO ISOTOPIC EVIDENCE FOR MOBILITY AT THE EARLY BRONZE AGE CEMETERY OF SINGEN, GERMANY. *Archaeometry* 54, 752–778; 10.1111/j.1475-4754.2011.00644.x (2012).
20. R. Krause, Die endneolithischen und frühbronzezeitlichen Grabfunde auf der Nordstadtterrasse von Singen am Hohentwiel. *Forschungen und Berichte zur Vor- und Frühgeschichte in Baden-Württemberg* 32 (Stuttgart 1988).
21. Matthias B. Merkl CORDED WARE, BELL BEAKERS AND THE EARLIEST BRONZE AGE IN THE HEGAU AND THE WESTERN LAKE CONSTANCE REGION MUSAICA *ARCHAEOLOGICA* 1 (2016)
22. Ulrich-Bochsler S, Cooper C, Meyer L, Rüttimann D, and Lanz C. 2012. Anthropologische Bearbeitung der Skelettreste vom Burgäschisee. In: Wey O, editor. *Die Cortaillod-Kultur am Burgäschisee Materialvorlage und Synthese zu den neolithischen Fundkomplexen von Burgäschisee-Ost, -Südwest, -Süd und -Nord*. Bern: Stämpfli Verlag AG. p 111-154.
23. Schlaginhaufen O. 1924a. Die anthropologischen Funde aus den Pfahlbauten der Schweiz. *Pfahlbauten, zehnter Bericht. Mitteilungen der Anthropologischen Gesellschaft in Zürich* 29(4):220-241.
24. Wiedmer-Stern J. 1904. Archäologie aus dem Oberaargau. *Archiv des Historischen Vereins des Kantons Bern* 17 (1903-1904)(2).
25. Steuri, N. et al. MULTIPLE RADIOCARBON DATING OF HUMAN REMAINS: CLARIFYING THE CHRONOLOGY AND SEQUENCES OF BURIALS IN THE LATE NEOLITHIC DOLMEN OF OBERBIPP (SWITZERLAND). *Radiocarbon* II, 1–13; 10.1017/RDC.2019.96 (2019).
26. Siebke I. et al. Crops vs. Animals: Regional Differences in Subsistence Strategies of Swiss Neolithic Farmers revealed by Stable Isotopes. *Submitted* (2019).
27. Furtwängler, Anja, et al. "Ratio of mitochondrial to nuclear DNA affects contamination estimates in ancient DNA analysis." *Scientific reports* **8.1** (2018): 14075.
28. Peltzer, Alexander, et al. "EAGER: efficient ancient genome reconstruction." *Genome biology* **17.1** (2016): 60.
29. Renaud, Gabriel, et al. "Schmutzi: estimation of contamination and endogenous mitochondrial consensus calling for ancient DNA." *Genome biology* **16.1** (2015): 224.
30. Weissensteiner, H. et al. HaploGrep 2: mitochondrial haplogroup classification in the era of high-throughput sequencing. *Nucleic Acids Research* **44**, W58-63 (2016).
31. Saag, L. et al. Extensive Farming in Estonia Started through a Sex-Biased Migration from the Steppe. *Current biology : CB* **27**, 2185-2193.e6; 10.1016/j.cub.2017.06.022 (2017).
